# Supplementary material
Source: Springer Nature journal article supplement (https://www.springermedizin.de/resource/supplementary/12943_2009_653_MOESM1_ESM.pdf/9554492)

FS-E

CQNHHC KHGKVC ELDENNTPMC

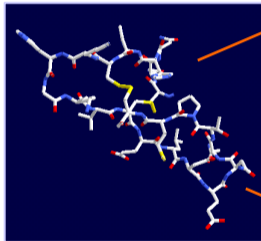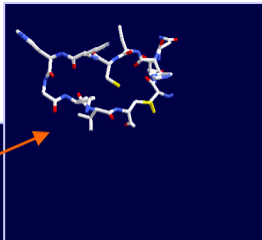

FSEN

CQNHHA KHGKVC

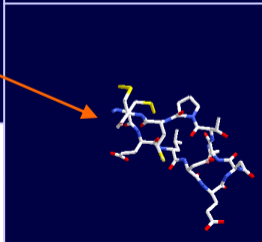

FSEC

C ELDENNTPMC

Supplement: MOESM1 [file 9554492]
